# Supplementary material for: An Innovative Fusion-Based Scenario for Improving Land Crop Mapping Accuracy
Source: MDPI journal article supplement (doi:10.3390/s22197428), 2022-09-30
Supplement: s1 [file s1]

**Table S1.** Acquisition times of Landsat-8, Sentinel 1 and 2 images.

| Test sites        | Test site #1 | Test site #2 | Test site #3 |
|-------------------|--------------|--------------|--------------|
| <b>Sentinel 2</b> | 2019/11/30   | 2019/3/26    | 2019/12/21   |
|                   | 2019/10/11   | 2019/4/17    | 2019/09/22   |
|                   | 2019/09/21   | 2019/6/14    | 2019/07/14   |
|                   | 2019/07/13   | 2019/7/14    | 2019/05/05   |
|                   | 2019/07/08   | 2019/8/3     | 2019/03/26   |
|                   | 2019/06/23   | 2019/9/19    | 2019/02/09   |
|                   | 2019/05/06   | 2019/10/9    | -            |
|                   | -            | 2019/10/19   | -            |
|                   | Test site #1 | Test site #2 | Test site #3 |
| <b>Sentinel 1</b> | 2019/10/10   | 2019/3/30    | 2019/10/01   |
|                   | 2019/08/11   | 2019/04/23   | 2019/07/09   |
|                   | 2019/07/18   | 2019/06/22   | 2019/06/15   |
|                   | 2019/07/06   | 2019/07/16   | 2019/05/22   |
|                   | 2019/06/12   | 2019/08/09   | 2019/04/16   |
|                   | 2019/05/07   | 2019/09/14   | 2019/03/23   |
|                   | 2019/04/24   | 2019/10/08   | 2019/02/03   |
| <b>Landsat-8</b>  | 2019/04/13   | 2019/03/26   | 2019/04/09   |
|                   | 2019/05/08   | 2019/06/14   | 2019/05/27   |
|                   | 2019/06/09   | 2019/06/30   | 2019/06/12   |
|                   | 2019/07/27   | 2019/07/23   | 2019/07/14   |
|                   | 2019/08/03   | 2019/08/01   | 2019/12/12   |
|                   | 2019/10/15   | 2019/09/18   | -            |
|                   | -            | 2019/10/20-  | -            |
